# Supplementary material for: Einarbeitung in der Intensiv- und Notfallmedizin in Deutschland
Source: Springer Nature journal article supplement (doi:10.1007/s00063-024-01108-0), 2024-02-02

# Sicherheitsgefühl nach Einarbeitung

## Planbare Tätigkeiten

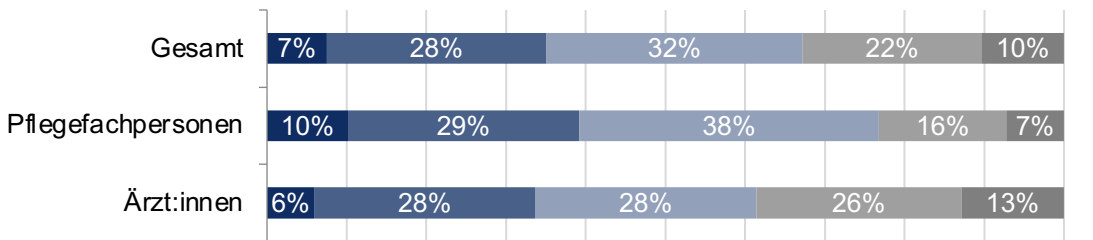

## Akute Notfälle

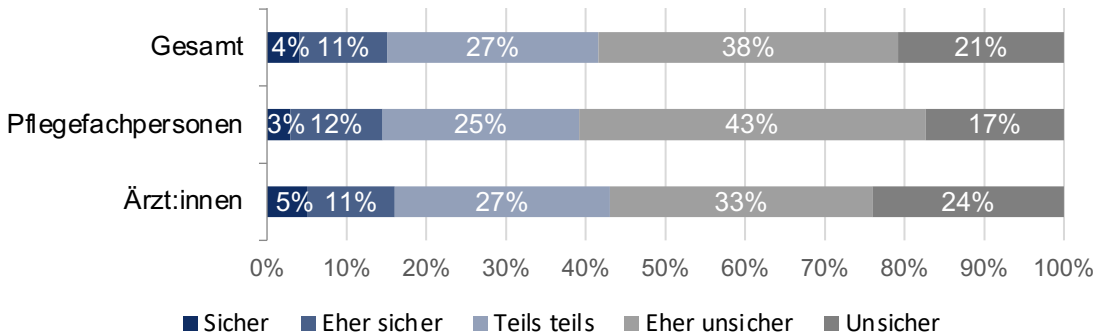

Supplement: MOESM1 [file 26692822]
