# Supplementary material for: Einarbeitung in der Intensiv- und Notfallmedizin in Deutschland
Source: Springer Nature journal article supplement (doi:10.1007/s00063-024-01108-0), 2024-02-02

## Psychische Belastung am Arbeitsplatz

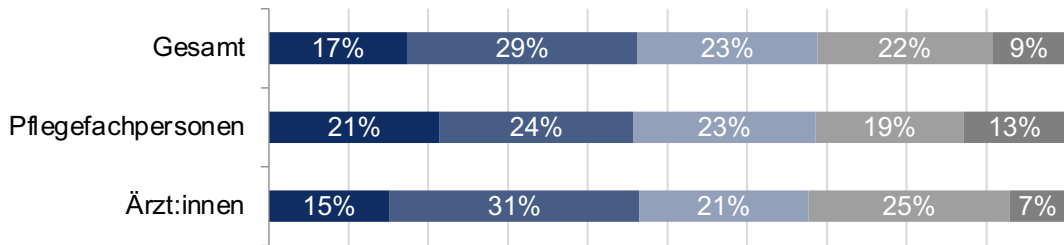

## Langfristige Tätigkeit in Intensiv-/Notfallmedizin vorstellbar

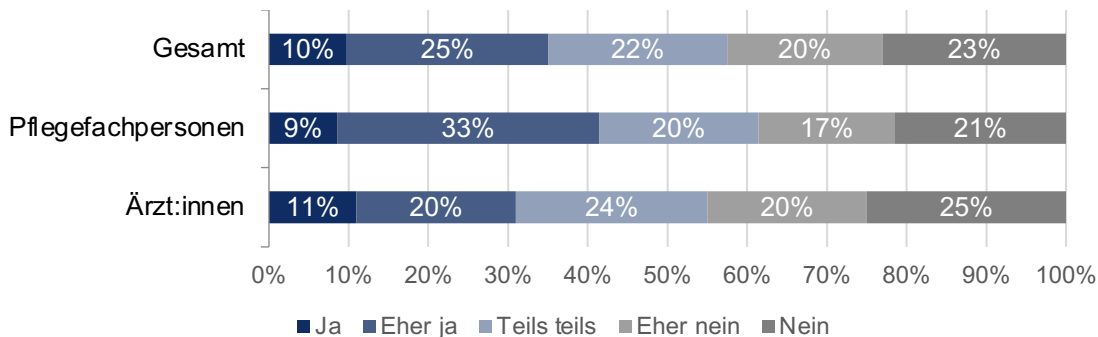

Supplement: MOESM2 [file 26692822]
